# Supplementary material
Source: ML conference proceedings conference paper supplement (https://openreview.net/forum?id=DkYQHewNcp)
Supplement: supplementary_material [file attachment]

```
In [1]: 1 import matplotlib
2 import matplotlib.pyplot as plt
3 import numpy as np
4
5 matplotlib.rcParams['figure.autolayout'] = False
6 matplotlib.rcParams['font.family'] = "DejaVu Sans"
7 matplotlib.rcParams['font.serif'] = "Computer Modern"
8 matplotlib.rcParams['text.usetex'] = True
9
10 matplotlib.rcParams['lines.linewidth'] = 3
11 matplotlib.rcParams['xtick.direction'] = "out"
12 matplotlib.rcParams['ytick.direction'] = "out"
13 matplotlib.rcParams['axes.labelsize'] = 16
14 matplotlib.rcParams['xtick.labelsize'] = 14
15 matplotlib.rcParams['ytick.labelsize'] = 14
16 matplotlib.rcParams['font.size'] = 16
17 matplotlib.rcParams['legend.fontsize'] = 16
18 matplotlib.rcParams['axes.titlesize'] = 16
19 matplotlib.rcParams['animation.html'] = "jshtml"
20 matplotlib.rcParams['figure.autolayout'] = True
21
22
23 cm = 1 / 2.54
```

## 0 load the data and optimized filters

```
In [5]: 1 D = np.load('dat.npy', allow_pickle=True).item()
2
3 X_ = D['X_'] # original spikes (before rearranging)
4 X_sorted = D['X_sorted'] # spike data with rows rearranged us
5 dat1 = D['dat1'] # position on the track
6 FILT = (D['FILT0'], D['FILT1']) # optimized filters
7 N = X_.shape[0]
```

```
In [ ]: 1
```

## 1 obtain the sorting indices

```
In [6]: 1 f = FILT[0].squeeze()
2 srt = sorted(list(zip(range(N), f.argmax(axis=1))), key=lambda tup:t
3 sorting_incices_0 = [i[0] for i in srt]
4
5 f = FILT[1].squeeze()
6 srt = sorted(list(zip(range(N), f.argmax(axis=1))), key=lambda tup:t
7 sorting_incices_1 = [i[0] for i in srt]
```

```
In [ ]: 1
```

## 2 use these indices to rearrange the order of neurons in the dataset

```

In [7]: 1 # generate fig 7
2
3 fig, (ax0, ax0a, ax1, ax2) = plt.subplots(
4     4, 1,
5     figsize=(26*cm, 13*cm),
6     dpi=300,
7     gridspec_kw=dict(height_ratios=[2,2,2,2]),
8     sharex=True)
9
10
11 ax0.spy(X_, aspect='auto', markersize=0.2, origin='lower', color='k')
12 ax0a.spy(X_sorted, aspect='auto', markersize=0.2, origin='lower', co
13
14 axt = ax0.twinx()
15 _ = axt.plot(dat1, 'r', lw=1)
16 axta = ax0a.twinx()
17 _ = axta.plot(dat1, 'r', lw=1)
18 axtb = ax1.twinx()
19 _ = axtb.plot(dat1, 'r', lw=1)
20 axtc = ax2.twinx()
21 _ = axtc.plot(dat1, 'r', lw=1)
22
23 axt.set_yticklabels([])
24 axta.set_yticklabels([])
25 axtb.set_yticklabels([])
26 axtc.set_yticklabels([])
27
28
29 ax1.spy(X_[sorting_incices_0,:], aspect='auto', markersize=0.2, orig
30 ax2.spy(X_[sorting_incices_1,:], aspect='auto', markersize=0.2, orig
31
32
33 for a in (ax0, ax0a, ax1, ax2):
34     a.set_ylabel(None)
35     a.set_yticklabels([])
36 for a in (ax0, ax0a, ax1, ax2):
37     a.set_xlim(0, 5000)
38     a.set_xlabel(None)
39
40
41 for i, ax in enumerate((ax0, ax0a, ax1, ax2)):
42     panelid = chr(65+i)
43     h_adjust = -0.03
44     v_adjust = 1.25
45     ax.text(h_adjust, v_adjust, f'$\mathbf{{panelid}}$', transform=ax
46     if panelid == 'E':
47         ax.set_xlabel('Time steps')

```

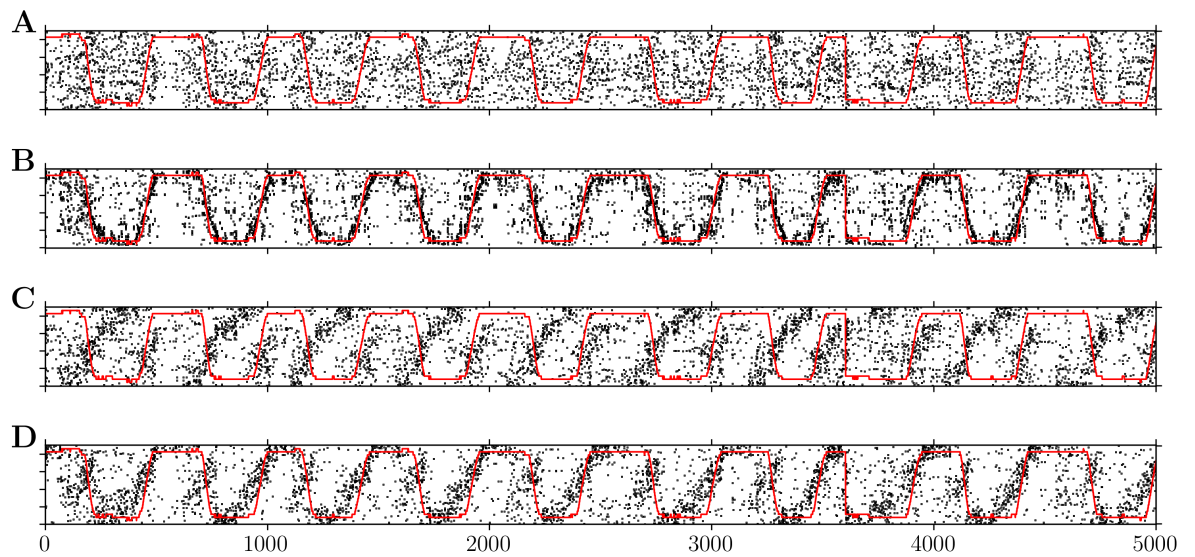

In [ ]:

1

**Unsorted (left) and sorted filters (right).**

**Top row - filter 0, bottom row - filter 1.**

```
In [18]: 1 fig, ax = plt.subplots(2,2, figsize=(10,10), sharex=True, sharey=True)
2         ax[0, 0].matshow(FILT[0])
3         ax[0, 1].matshow(FILT[0][sorting_incices_0,:])
4         ax[1, 0].matshow(FILT[1])
5         ax[1, 1].matshow(FILT[1][sorting_incices_1,:])
```

Out[18]: <matplotlib.image.AxesImage at 0x7f90165fd590>

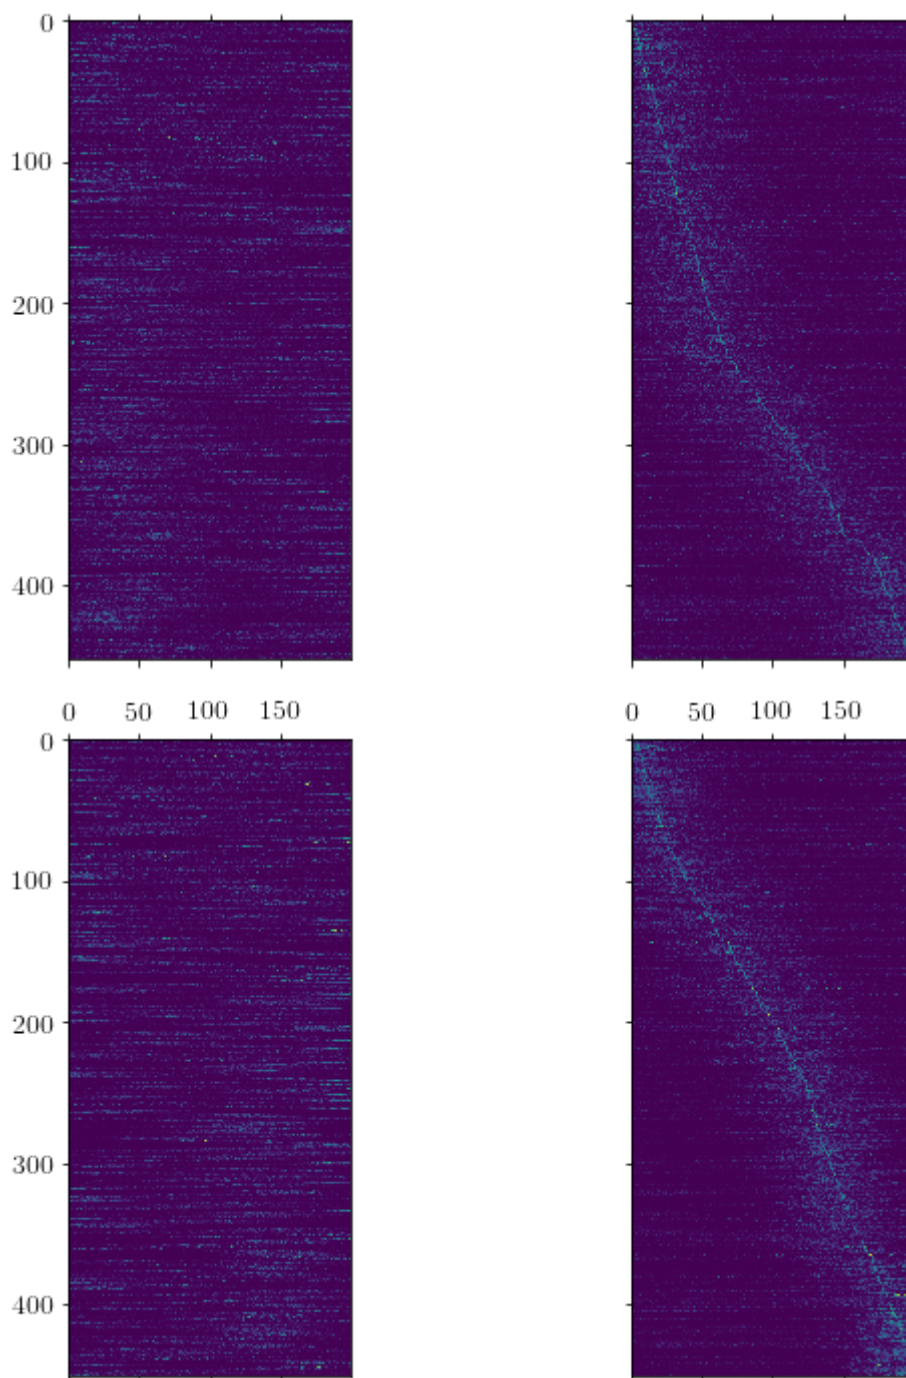

```
In [17]: 1 FILT[0].shape
```

Out[17]: (452, 200)

```
In [ ]: 1
```
